# Supplementary material
Source: HighWire-hosted journal article supplement (https://bmjopenquality.bmj.com/highwire/filestream/136267/field_highwire_adjunct_files/0/ds5875.pdf)

# Framework for Cardiopulmonary Resuscitation (CPR) Decisions

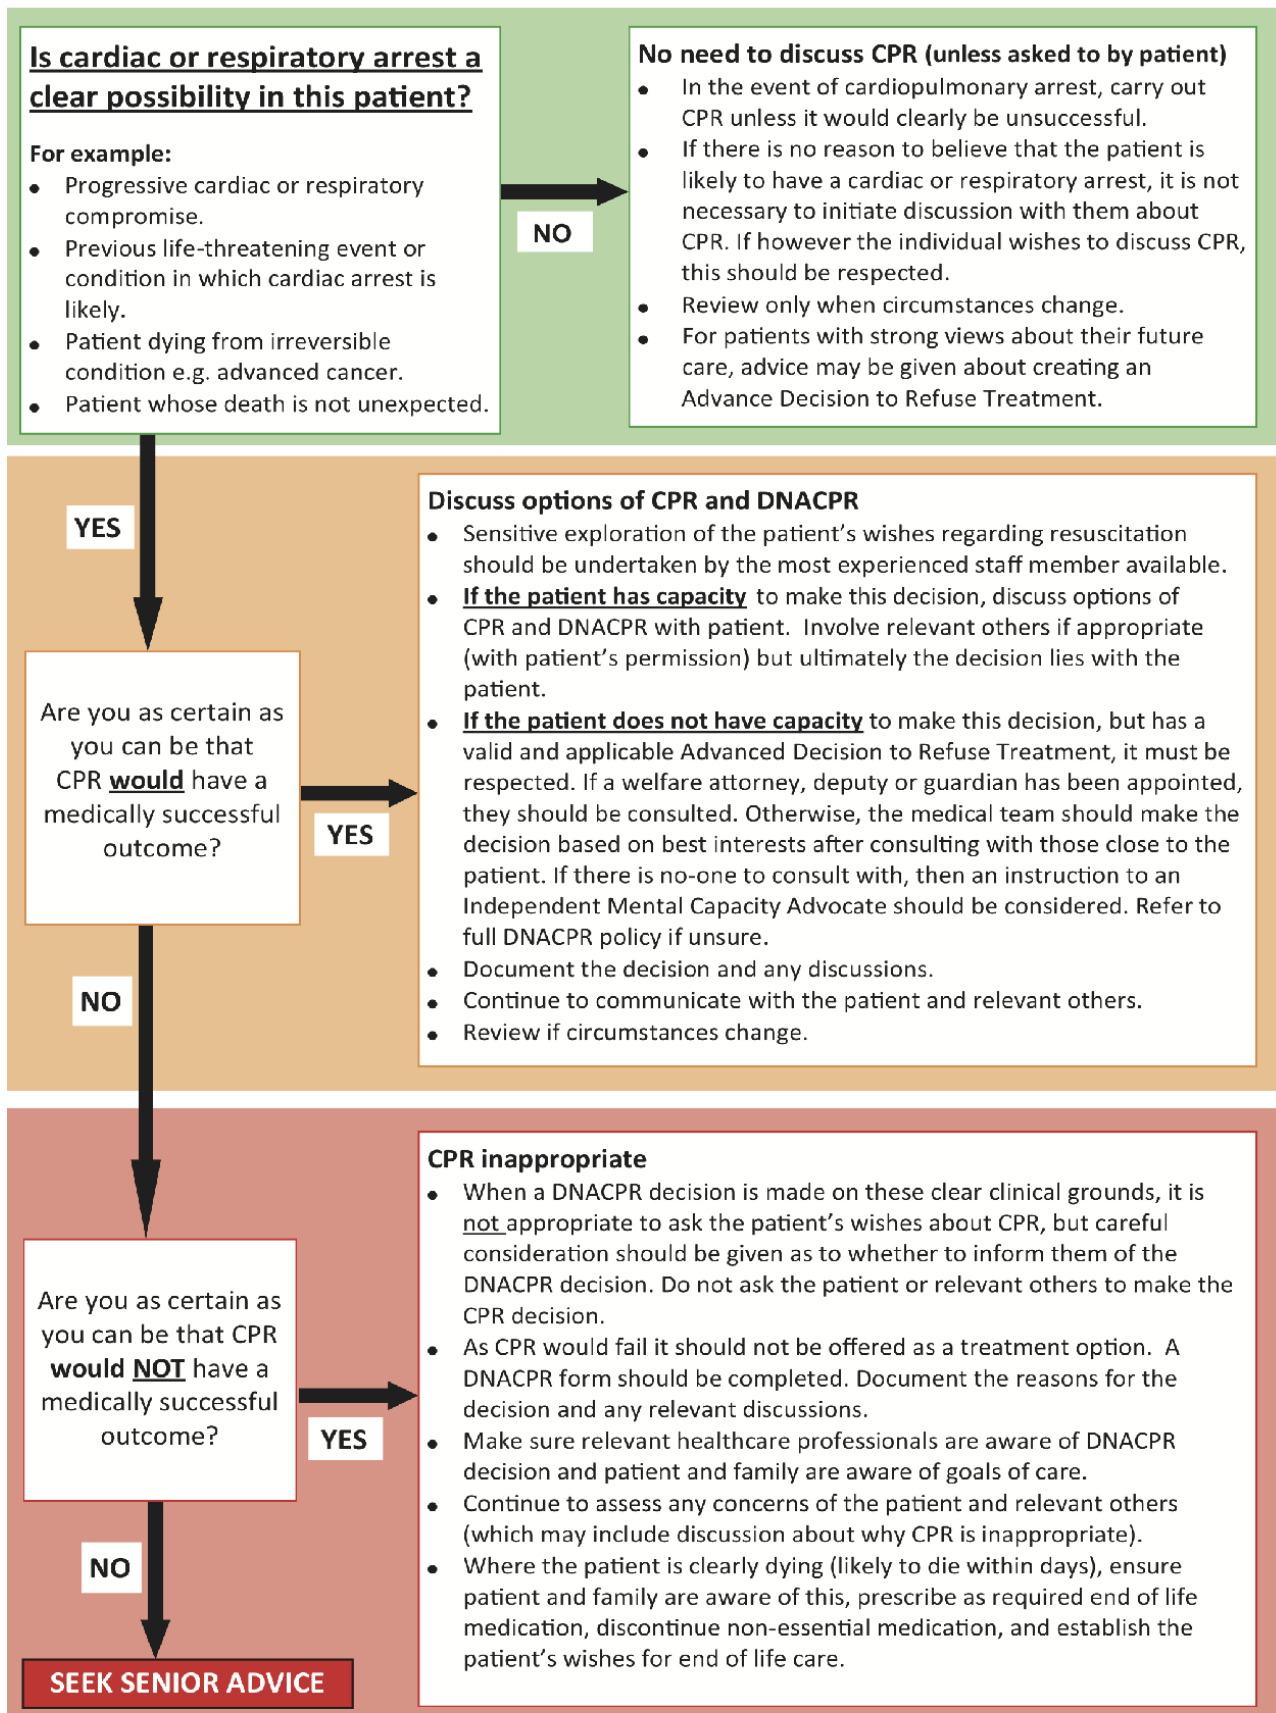

Supplement: ds5875.pdf [file ds5875.pdf]
